# Supplementary material for: Crystal Structure of Pyrrolysyl-tRNA Synthetase from a Methanogenic Archaeon ISO4-G1 and Its Structure-Based Engineering for Highly-Productive Cell-Free Genetic Code Expansion with Non-Canonical Amino Acids
Source: MDPI journal article supplement (doi:10.3390/ijms24076256), 2023-03-26
Supplement: s1 [file s1]

Fig. S1 Yanagisawa *et al.*

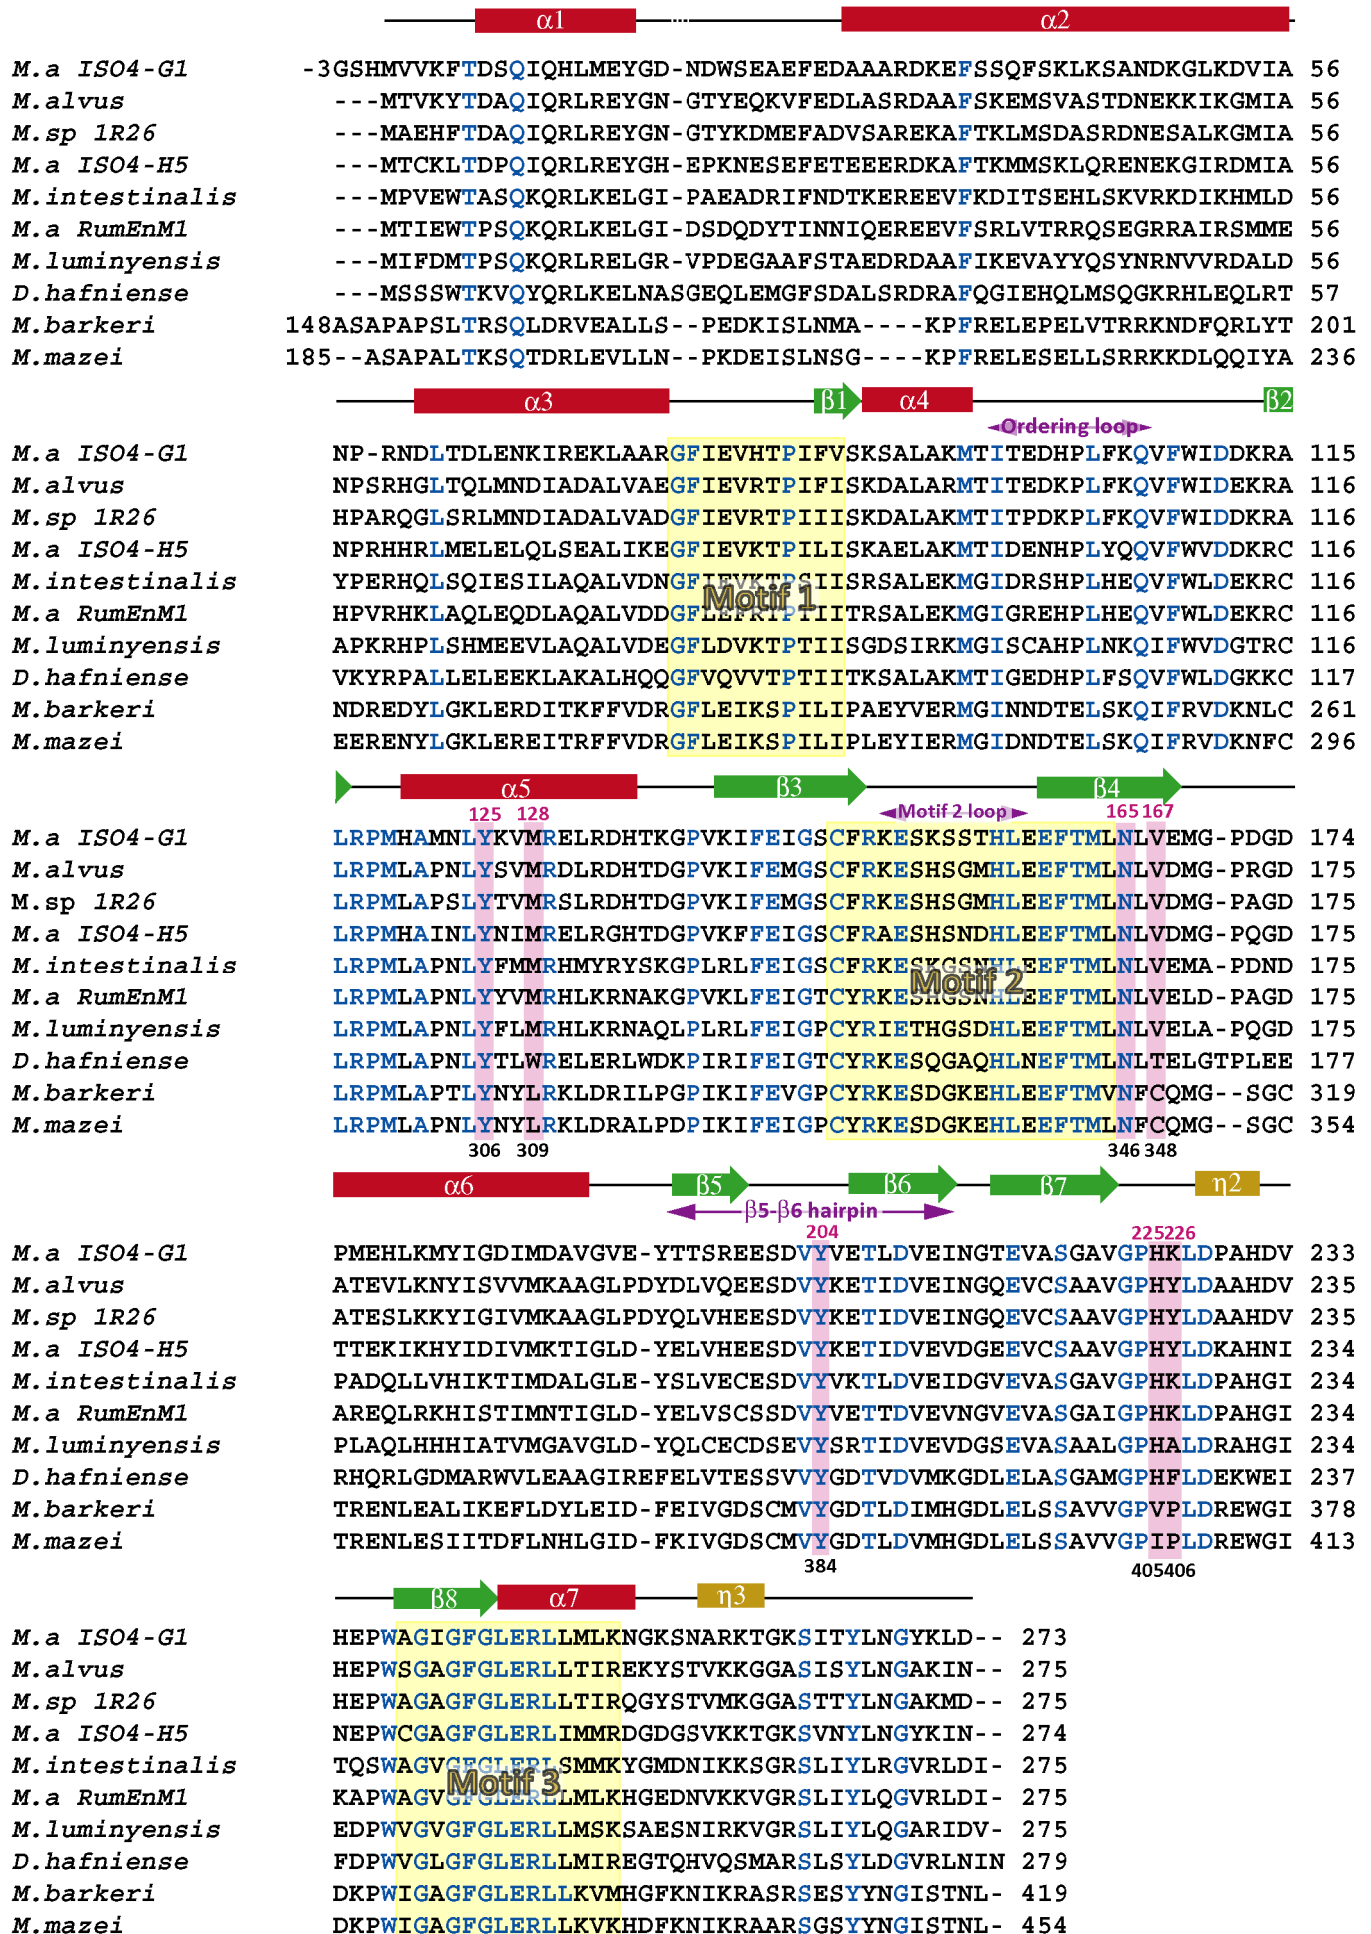

**Fig. S1. Structure-based sequence alignments of ISO4-G1 PylRS and other PylRSs.**

The PylRS sequences were aligned with the program CLUSTAL W [89], and then parts of the alignments were adjusted manually. Highly conserved residues among the PylRSs are shown in blue. The secondary structures ( $\alpha$ -helices,  $3_{10}$  helices, and  $\beta$ -sheets) are shown as wine red bars, olive bars, and green arrows, respectively, above the sequence alignments. Numbers at the top and bottom correspond to the amino acid residues of ISO4-G1 PylRS and *Mm*PylRS, respectively. Dashes represent breaks in the actual amino acid sequences to allow sequence alignments with PylRSs. Motifs 1, 2, and 3 are colored yellow. The ordering loop, the motif-2 loop, and the  $\beta$ 5- $\beta$ 6 hairpin are shown on the top line. Amino acid residues that were mutated in this study are colored pink. Accession numbers are as follows. ISO4-G1 PylRS (*M.a* ISO4-G1, AMK13702); *Ma*PylRS (*M. alvus*, WP\_015505008); 1R26PylRS (*M. sp* 1R26, WP\_058747239); ISO4-H5 PylRS (*M.a* ISO4-H5, WP\_066075773); RumPylRS (*M.a RumEnM1*, KQM11560); *MI*PylRS (*M. luminyensis*, WP\_019176308); *Mt*PylRS (*M. termitum*, WP\_048111907); *Mi*PylRS (*M. intestinalis*, WP\_020448777); *Dh*PylSc (*D. hafniense*, WP\_018307530); *Mb*PylRS (*M. barkeri*, Q6WRH6); and *Mm*PylRS (*M. mazei*, Q8PWY1).

**Fig. S2 Yanagisawa *et al.***

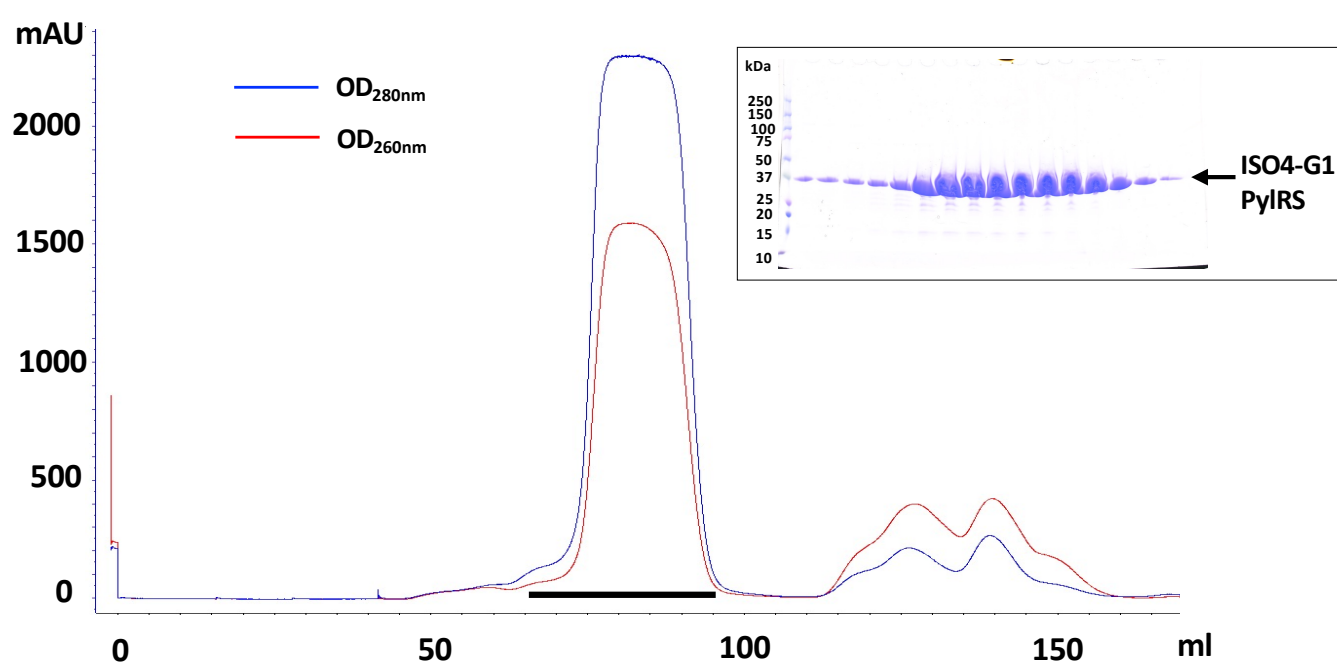

**Fig. S2. Chromatogram for the purification of ISO4-G1 PylRS by Superdex 200 size-exclusion chromatography.** SDS-PAGE analysis of the ISO4-G1 PylRS fractions (inset). The absorbances of the ISO4-G1 PylRS fractions are saturated at 280 nm and 260 nm. The black bar represents the range of fractions subjected to SDS-PAGE analysis.

**Fig.S3 Yanagisawa *et al.***

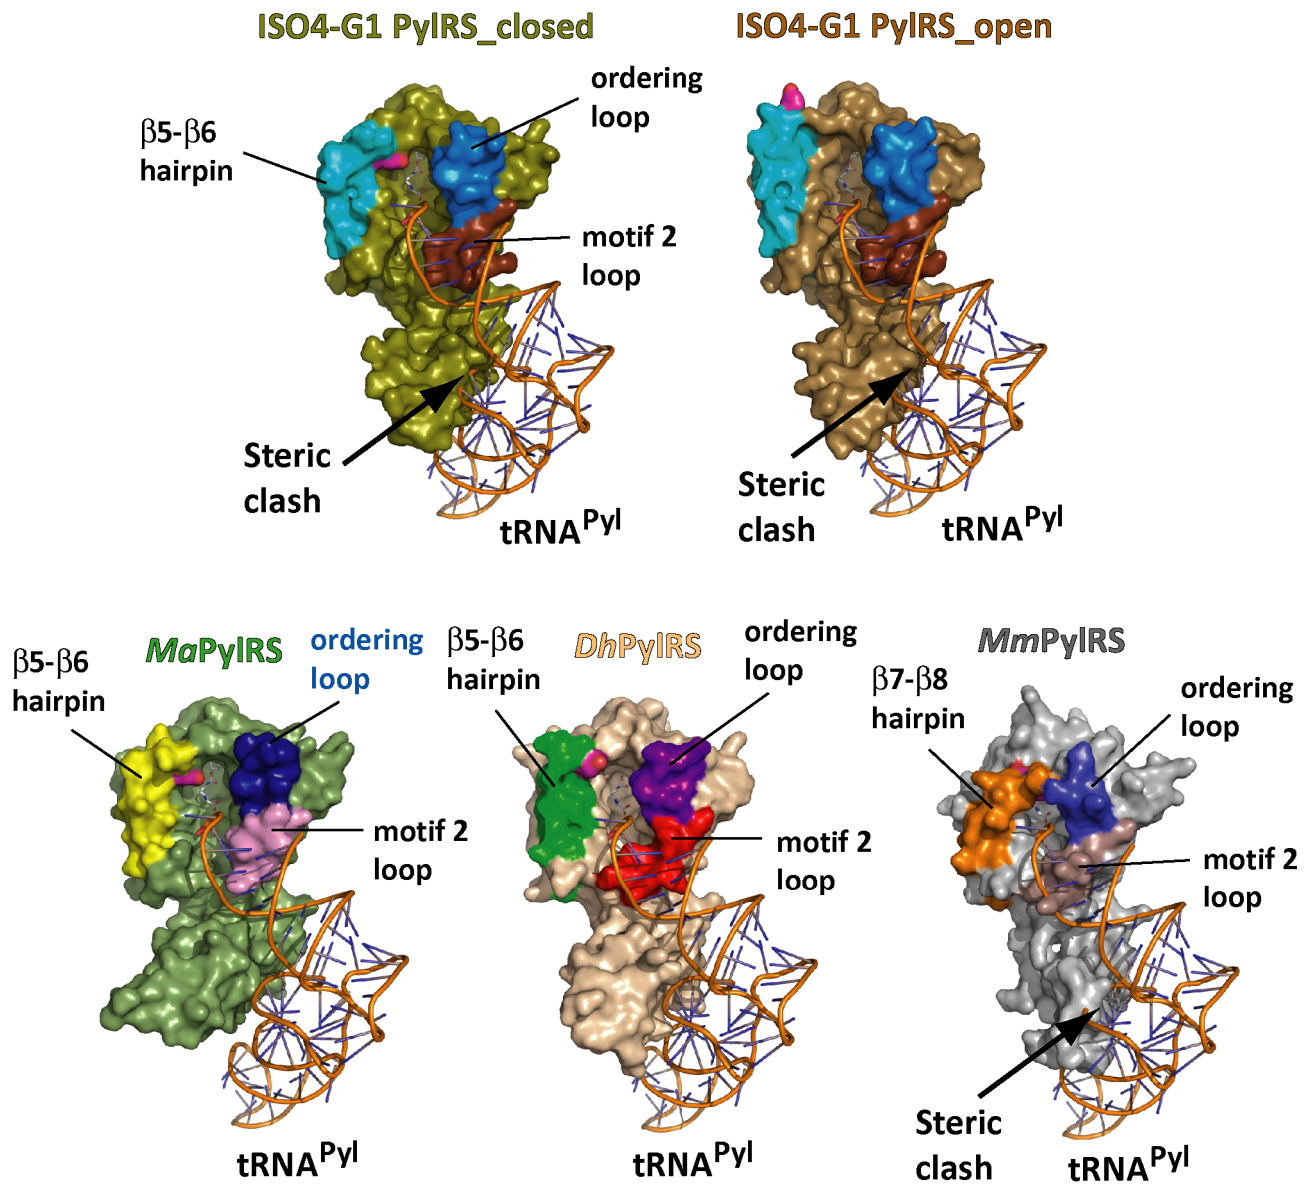

**Fig. S3. Structural comparison of ISO4-G1 PylRS with *Ma*PylRS, *Mm*PylRSc, and *Dh*PylSc•tRNA<sup>Pyl</sup>.**

Superimpositions of the ISO4-G1 PylRS with the *Ma*PylRS, the *Dh*PylSc•tRNA<sup>Pyl</sup> complex (PDB code: 2ZNI), the apo form (PDB: 2E3C), and the Pyl-AMP-bound *Mm*PylRSc (PDB: 2ZIM) structures, represented by surface models. The ordering loop, the motif-2 loop, and the  $\beta$ 5- $\beta$ 6 hairpin ( $\beta$ 7- $\beta$ 8 hairpin in *Mm*PylRS) are colored differently. The catalytic core structures of ISO4-G1 PylRS, *Ma*PylRS, *Dh*PylSc, and *Mm*PylRSc superimposed well, but the two  $\alpha$ -helices ( $\alpha$ 1 and  $\alpha$ 2) of *Mm*PylRSc are slightly tilted and cause steric hindrance with tRNA<sup>Pyl</sup>.



**Fig. S4 Yanagisawa *et al.***

**a**      **Open (molecule A)**

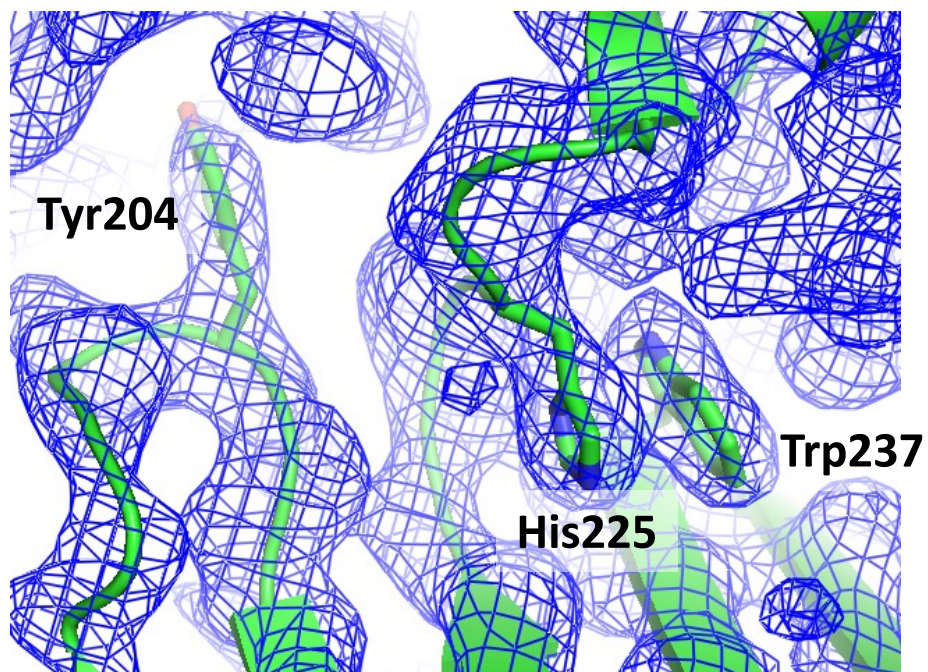

**b**      **Closed (molecule B)**

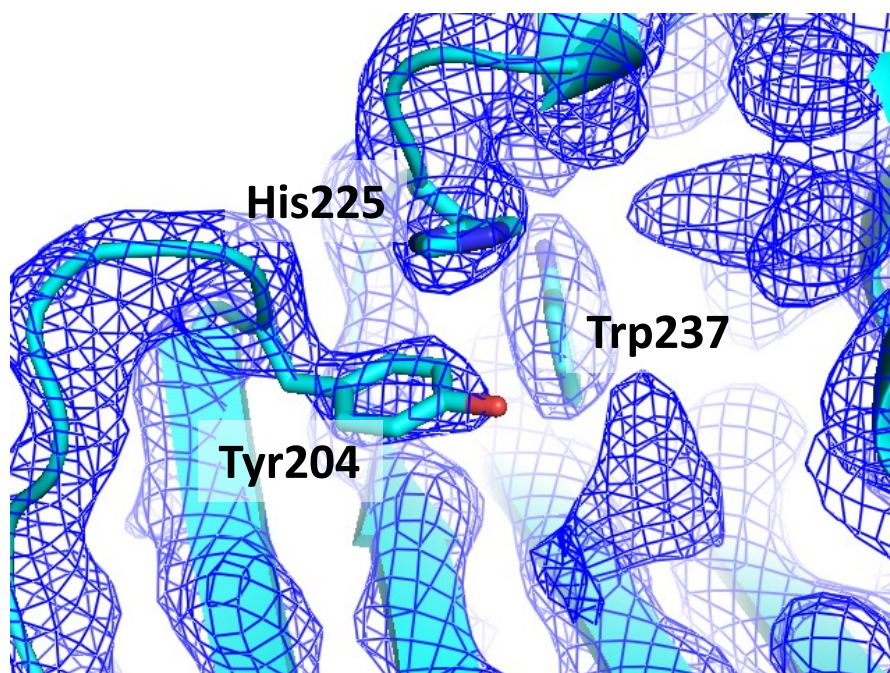

**Fig. S4. Electron density map of the  $\beta 5$ - $\beta 6$  region in the ISO4-G1 PylRS structure.**

The *2Fo-Fc* electron density map for the regions around Tyr204, His225, and Trp237 is represented as a blue mesh at a contour level of  $1\sigma$ . (a) The open conformation. (b) The closed conformation. The Tyr204, His225, and Trp237 residues are shown as stick models.



Fig. S5 Yanagisawa *et al.*

**a**

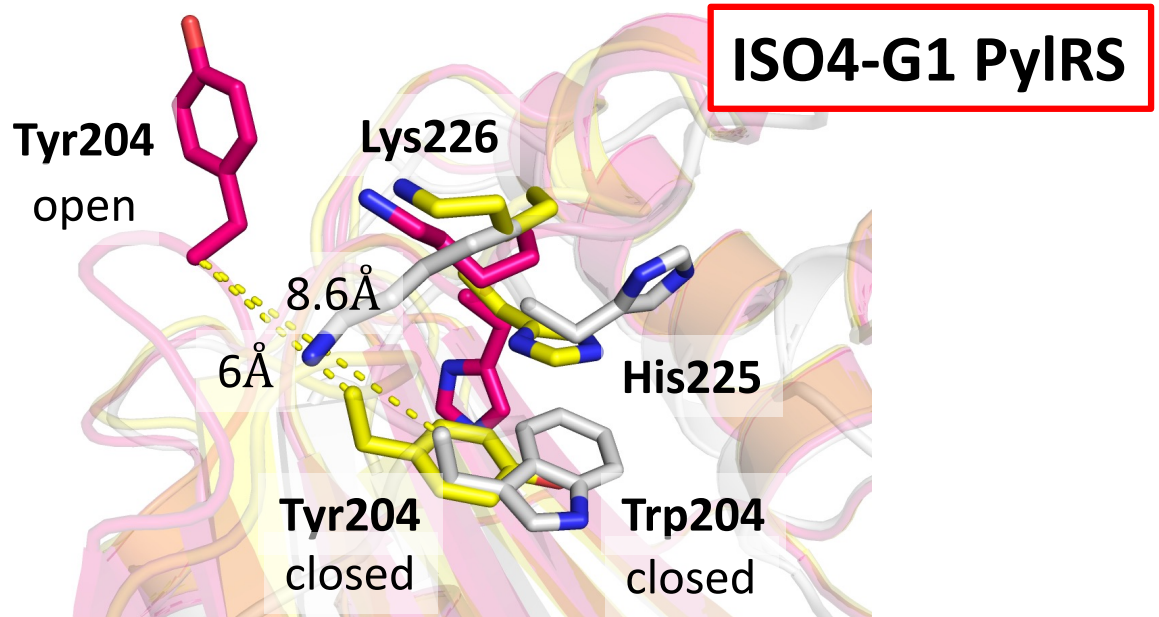

**b**

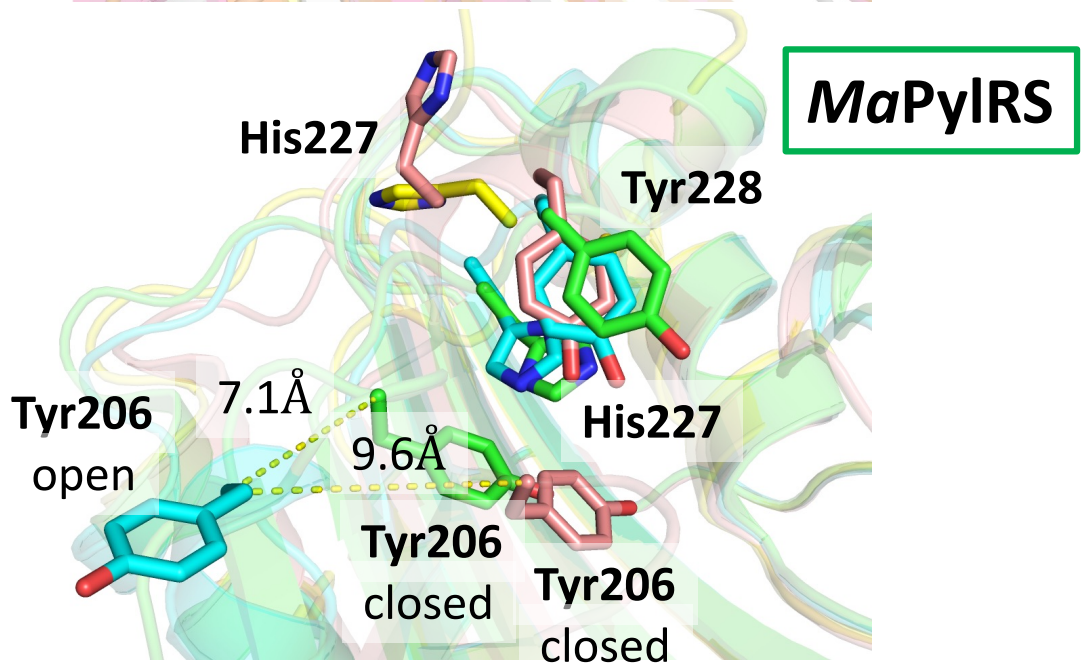

**c**

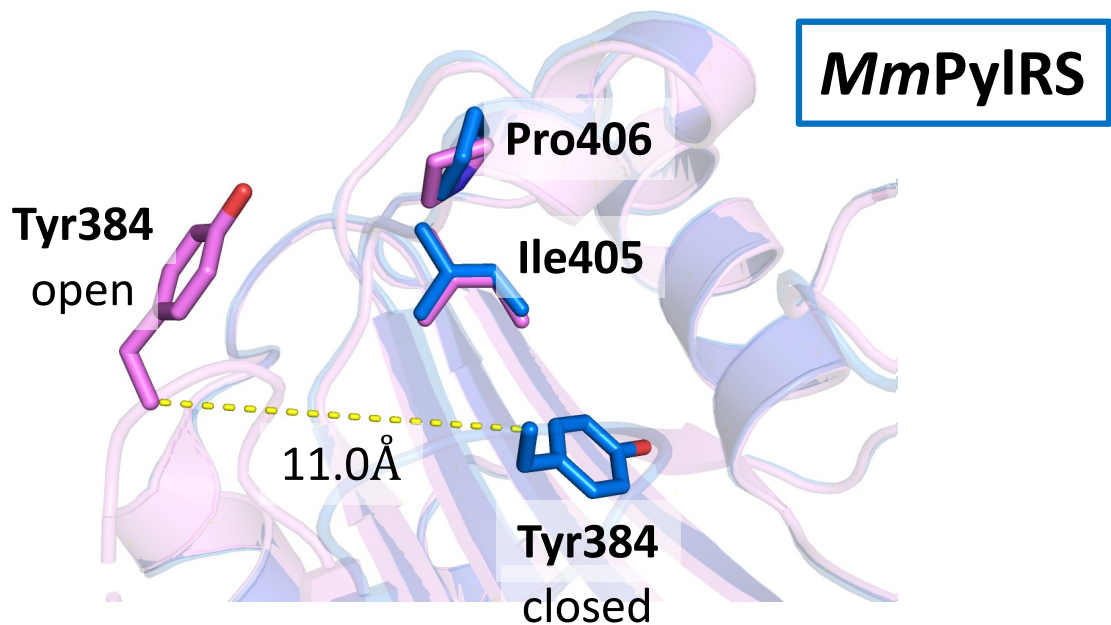

**Fig. S5. Conformational changes of the active-site residues in the open and closed forms of the ISO4-G1 PylRS, *Ma*PylRS, and *Mm*PylRS structures.** (a) The open and closed conformations of the ISO4-G1 PylRS apo form (magenta and yellow, respectively), and the closed conformation of the ISO4-G1 PylRS mutant (7R6O, white). (b) The open and closed conformations of the *Ma*PylRS apo form (6JP2, cyan and light green, respectively), and the closed conformation of the *de novo* screened *Ma*PylRS(N166A/C168G/W239C) mutant bound to acrydonylalanine and AMPPNP (8DQG, vermilion). Tyr206 is disordered in the AMPPNP-bound form (8DQG, yellow). (c) The open conformation of the *Mm*PylRS apo form (pink), and the closed conformation of *Mm*PylRS bound to pyrrolysyladenylate (2Q7H, sky blue). The translucent ribbon models are shown in the background. The ISO4-G1 PylRS Tyr205 residue corresponds to Tyr206 in *Ma*PylRS, and to Tyr384 in *Mm*PylRS. The ISO4-G1 PylRS His225 residue corresponds to His227 in *Ma*PylRS, and to Ile405 in *Mm*PylRS. The ISO4-G1 PylRS Lys226 residue corresponds to Tyr228 in *Ma*PylRS, and to Pro406 in *Mm*PylRS. Each residue is shown as a stick model.

**Fig.S6 Yanagisawa *et al.***

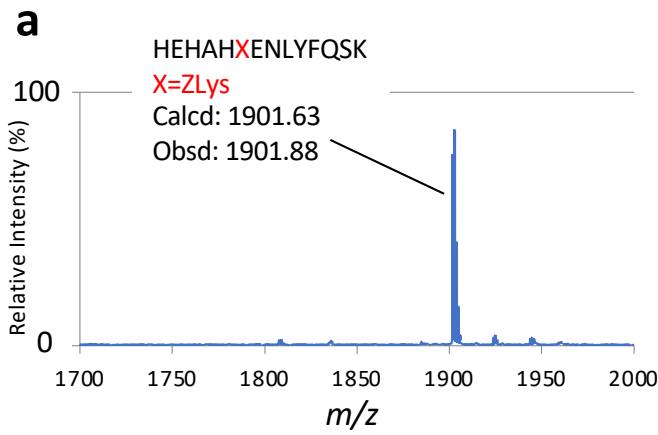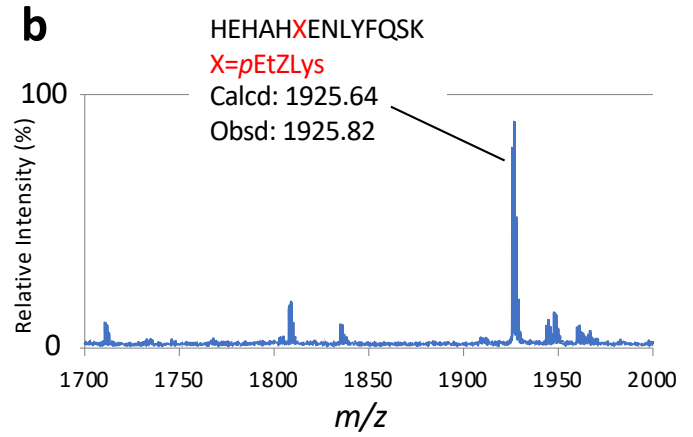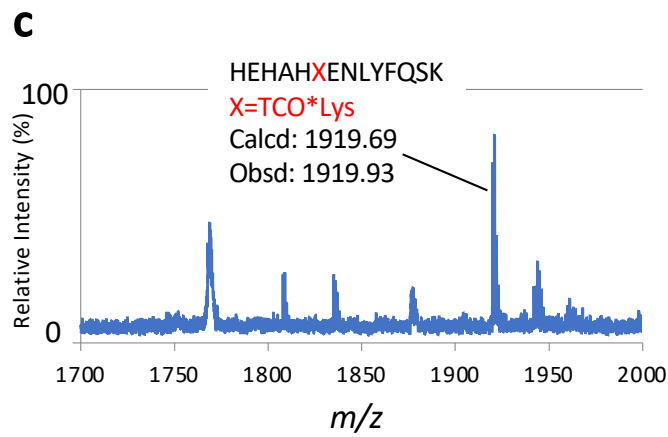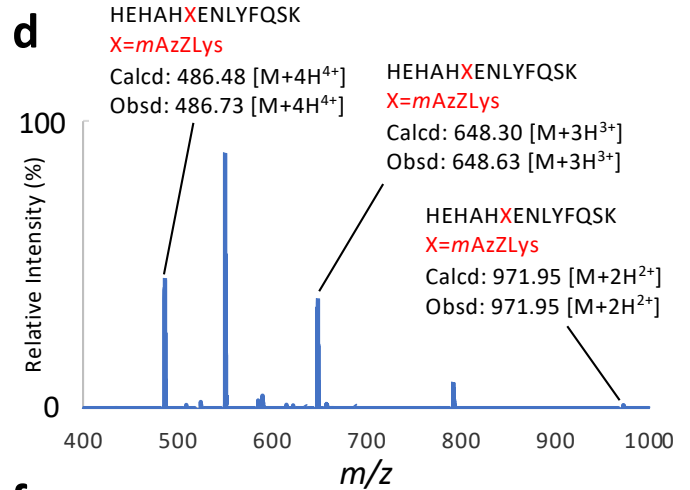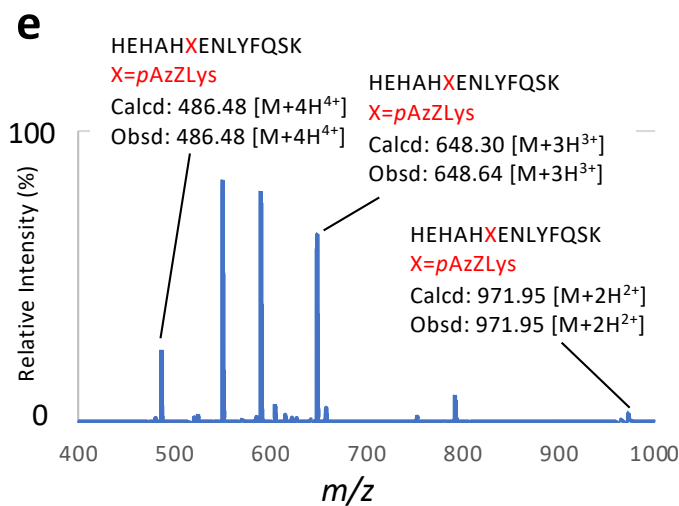

**f**

**N11-17amber**-GFPS1 sequence

MKDHLIHHHKKHEHAH**X**ENLYFQSKGEELFTGVVPIL  
 VELDGDVNGHKFSVSGEGEGDATYGKLTCLKICTTGK  
 LPVPWPTLVTTLTYGVCFSRYPDHMKRHDFFKSAM  
 PEGYVQERTISFKDDGNYKTRAEVKFEGDTLVNRIELK  
 GIDFKEDGNILGHKLEYNYNSHNVYITADKQKNGIKA  
 NFKIRHNIEDGSVQLADHYQQNTPIGDGPVLLPDNH  
 YLSTQSALS KDPNEKRDH MVLLFVTAAGITHGMDE  
 LYK

**Fig. S6. Mass spectrometry analysis of N11-GFPS1 proteins containing non-canonical amino acids.** The amino acid sequence of GFPS1, with a 24-residue N11-peptide tag at the N-terminus, is shown in (f). The codon of the N11-GFPS1 residue Ala17, which is highlighted by a red X, is mutated to an amber (UAG) codon. The incorporations of ZLys (a), *p*EtZLys (b), and TCO\*Lys (c), at position 17 in N11-GFPS1, were confirmed by MALDI-TOF analyses. The PMF analysis of the tryptic digests by MALDI-TOF mass spectrometry revealed major peaks (obsd.:  $m/z$  1,901.88  $[M+H]^+$ ,  $m/z$  1,925.82  $[M+H]^+$ ,  $m/z$  1,919.93  $[M+H]^+$ ) that match the theoretical masses of the tryptic peptides HEHAHXENLYFQSK, where X represents ZLys, *p*EtZLys, and TCO\*Lys, respectively (calcd.:  $m/z$  1,901.63  $[M+H]^+$ ,  $m/z$  1,925.64  $[M+H]^+$ ,  $m/z$  1,919.69  $[M+H]^+$ ). The incorporations of *m*AzZLys (d) and *p*AzZLys (e), at position 17 in N11-GFPS1, were confirmed by ESI-MS analyses of the tryptic peptide HEHAHXENLYFQSK (X represents a non-canonical amino acid). The ESI mass analysis revealed the tryptic peptides containing *m*AzZLys (obsd.:  $m/z$  971.95  $[M+2H]^{2+}$ , calcd.:  $m/z$  971.95  $[M+2H]^{2+}$ ; obsd.:  $m/z$  648.63  $[M+3H]^{3+}$ , calcd.:  $m/z$  648.30  $[M+3H]^{3+}$ ; obsd.:  $m/z$  486.73  $[M+4H]^{4+}$ , calcd.:  $m/z$  486.48  $[M+4H]^{4+}$ ) and *p*AzZLys (obsd.:  $m/z$  971.95  $[M+2H]^{2+}$ , calcd.:  $m/z$  971.95  $[M+2H]^{2+}$ ; obsd.:  $m/z$  648.64  $[M+3H]^{3+}$ , calcd.:  $m/z$  648.30  $[M+3H]^{3+}$ ; obsd.:  $m/z$  486.48  $[M+4H]^{4+}$ , calcd.:  $m/z$  486.48  $[M+4H]^{4+}$ ). The observed molecular masses agreed well with the calculated masses.

**Table S1**

Data collection and refinement statistics.

|                                       |                     |
|---------------------------------------|---------------------|
|                                       | ISO4-G1 PylRS       |
| PDB code                              | 8IFJ                |
| X-ray source                          | SPring-8<br>BL32XU  |
| No. of crystals                       | 1                   |
| Wavelength                            | 1.0000              |
| Space group                           | $P2_12_12_1$        |
| Cell dimensions                       |                     |
| $a$ (Å)                               | 98.51               |
| $b$ (Å)                               | 102.68              |
| $c$ (Å)                               | 349.86              |
| $\alpha, \beta, \gamma$ (°)           | 90, 90, 90          |
| Resolution (Å)                        | 50–2.78 (2.85–2.78) |
| $I/\sigma$ (I)                        | 14.47 (1.32)        |
| Completeness (%)                      | 99.73 (99.77)       |
| No. reflections                       | 90,164              |
| Redundancy (%)                        | 5.99 (6.07)         |
| $R_{\text{meas}}$                     | 0.16 (1.94)         |
| Refinement                            |                     |
| $R_{\text{work}}/R_{\text{free}}$ (%) | 23.3/29.5           |
| Resolution (Å)                        | 49.9–2.78           |
| No. atoms                             |                     |
| protein                               | 21,566              |
| water                                 | 49                  |
| No. reflections<br>(total / test)     | 90,021/1,999        |
| Average B-factors                     |                     |
| protein                               | 100.10              |
| water                                 | 57.18               |
| R.m.s. deviations                     |                     |
| Bond length (Å)                       | 0.004               |
| Bond angles (°)                       | 0.640               |
| Ramachandran plot                     |                     |
| Most favored (%)                      | 96.09               |
| Allowed (%)                           | 3.91                |
| Disallowed (%)                        | 0.00                |

The numbers in parentheses are for the last shell.

$$^a R_{\text{meas}} = S_{hkl} (n^{1/2}/(n-1)^{1/2}) S_i |I_{\text{avg}} - I_i| / S_{hkl} S I_i.$$

$$^b R_{\text{work}} = S_{hkl} |F_o - F_c| / S_{hkl} F_o \text{ for reflections of work set.}$$

$$^c R_{\text{free}} = S_{hkl} |F_o - F_c| / S_{hkl} F_o \text{ for reflections of test set [2.2\% of total reflections for ISO4-G1 PylRS].}$$

**Table S2**

DNA sequence of the pET28\_ISO4-G1 PylRS(Y125A/M128L) plasmid.

The ISO4-G1 PylRS(Y125A/M128L) gene, shown in red capital letters, was inserted into the *NdeI* and *BamHI* sites of the pET28 vector. The 125Ala (GCT) and 128Leu (CTG) codons are highlighted in cyan.

tggcgaatgggacgcgccctgtagcggcgcatthaagcgcggcggggtgtggtggttacgcgcagcgtgacc  
gctacacttgccagcgccttagcgcggcgctcctttcgctttctcccttccctttctcgccacgttcgccg  
gctttccccgtcaagctctaaatcgggggctcccttttagggttccgatttagtgctttacggcacctcga  
ccccaaaaaacttgattaggggtgatgggtcacgtagtgggcatcgccctgatagacgggtttttcgccct  
ttgacggttgaggtccacgttctttaatagtggtacgttctgttccaaactggaacaacactcaaccctatct  
cgggtctattcttttgattataagggattttgcccgtttcggcctattggttaaaaaatgagctgattta  
acaaaaatttaacgcgaattttaacaaaatattaacgtttacaatttcagggtggcacttttcggggaaat  
gtgcgcggaaccctatttgttatttttctaatacattcaaatatgtatccgctcatgaattaattct  
tagaaaaactcatcgagcatcaaatgaaactgcaatttcatatcaggattatcaataccatattttt  
gaaaaagccgtttctgtaatgaaggagaaaaactcacggagggtccataggatggcaagatcctggta  
tcgggtctgcgattccgactcgtccaacatcaatacaacctattaatttccctcgtcaaaaaataaggtta  
tcaagtgaagaaatcaccatgagtgacgactgaatccgggtgagaatggcaaaagtattatgcatttctttcc  
agacttggtcaacaggccagccattacgctcgtcatcaaaatcactcgcacatcaacaaaccgttattcat  
tcgtgattgcgcctgagcgcagacgaaatacgcgatcgtgtttaaaggacaattacaaacaggaatcgaa  
tgcaaccggcgcaggaacactgccagcgcacatacaaatattttcacctgaatcaggatattcttcttaata  
cctggaatgctgttttcccggggatcgcagtggtgagtaaccatgcatcatcaggagtacggataaaatg  
cttgatggtcggagaggcataaattccgctcagccagtttagtctgaccatctcatctgtaacatcattg  
gcaacgctacctttgccatgtttcagaaacaactctggcgcatcgggcttcccatacaatcgatagattg  
tcgcacctgattgcccgcattatcgcgagccattatacccatataaatcagcatccatggttggaaat  
taatcgcgccctagagcaagacgtttcccggttgaatatgggtcataaacacccttgattactgtttatg  
taagcagacagttttattgttcatgacaaaaatcccttaacgtgagttttcgttccactgagcgtcagac  
cccgtagaaaagatcaaaggatcttcttgagatccttttttctgcgcgtaactcgtgctgtgcaaaaa  
aaaaaccaccgctaccagcgggtggtttgttggcgatcaagagctaccaactctttttccgaaggtaac  
tggtcttcagcagagcgcagataccaaatactgtcctctagtgtagccgtagttaggccaccacttcaag  
aactctgtagcaccgcctacatacctcgtctgctaactcctgttaccagtggtgctgccagtggtgcata  
agtctgtcttaccgggttgactcaagacgatagttaccggataaaggcgcagcgggtcgggtgaacggg  
gggttcgtgcacacagcccagcttgagcgaacgacctacaccgaactgagatacctacagcgtgagcta  
tgagaaagcgcacgcttcccgaaggagaaaggcgagaggtatccggtaagcggcaggggtcggagcag  
gagagcgcacgagggagcttccagggggaaacgcctggatctttatagtcctgtcgggtttcggcacct  
ctgacttgagcgtcgtattttgtgatgctcgtcagggggggcgagcctatgaaaaaacgccagcaacgcg  
gcctttttacggttctcctggccttttgcctgttgcacatgttctttcctgcgttatccctgatt  
ctgtggataaccgtattaccgcctttgagtgagtgataccgctcgcgcagccgaacgaccgagcgcag  
cgagtcagtgagcaggaagcgggaagagcgcctgatgcggtattttctccttacgcatctgtgcggtatt  
tcacaccgcataatatggtgactctcagtaacaatctgctctgatgccgcatagttaagccagtatacact  
ccgctatcgtctacgtgactgggtcatgggtgcgccccgacaccgcgaacaccgcgtgacgcgccctgac  
gggcttgctgtctcccggcatccgcttacagacaagctgtgaccgtctccgggagctgcatgtgtcagag  
gttttcaccgtcatcaccgaaacgcgcgagggcagctgcggtaaaagctcatcagcgtggctcgtgaagcgt  
tcacagatgtctgcctgttcatccgcgtccagctcgttgagtttctccagaagcgttaatgtctggcttc  
tgataaaagcggggccatgttaaggcggttttttccctgtttggtcactgatgcctccgtgtaagggggatt  
tctgttcatgggggtaatgataccgatgaaacgagagaggatgctcacgatacgggttactgatgatgaa  
catgcccggttactggaacgttgtaggggtaacaactggcggtatggatgcggcgggaccagagaaaaa  
tcactcaggggtcaatgccagcgttcgttaatacagatgtaggtgttccacagggtagccagcagcatcc  
tgcgatgcagatccggaacataatggtgcagggcgctgacttccgcgtttccagactttacgaaacacgg  
aaaccgaagaccattcatgttggtgctcaggtcgcagacgttttgagcagcagtcgcttcacgttcgct  
cgcgatcgggtgattcattctgctaaccagtaaggcaaccccgccagcctagccgggtcctcaacgacag  
gagcacgatcatgcgcacccgtggggccgcatgccggcgataatggcctgcttctcgccgaaacgtttg  
gtggcgggaccagtgacgaaggcttgagcagggcggtgcaagattccgaataccgcaagcgacaggccga

tcatgctgcgctccagcgaaagcggttcgcgcggaaatgaccagagcgtgcgcgccactgtccac  
gagttgcatgataaagaagacagtcataagtcgcgcgacgatagtcaccccgcccacccggaaggag  
ctgactgggttgaggctctcaagggcacgcggtcgagatcccggtgcctaagtgatgagctaacttacat  
taattgcgttgcgctcactgccgcgtttccagtcgggaaacctgtcgtagccagctgcattaatgaatcgg  
ccaacgcgcggggagaggcgggttgcgattggggcgcagggtgtttttcttttcaccagtgagacggg  
caacagctgattgcccttcaccgcctggccctgagagagttgcagcaagcgtccacgctgggttgcccc  
agcaggcgaaaatcctgtttgatgggtggttaacggcgggatataacatgagctgtcttcggtatcgtcgt  
atcccactaccgagatatccgcaccaacgcgcagcccgactcggaatggcgcgcattgcgccagcgc  
catctgatcggttggaaccagcatcgcagtggggaacgatgccctcattcagcatttgcatgggttggtga  
aaaccggacatggcactccagtcgccttccggttccgctatcggtgaatttgattgcgagtgagatatt  
tatgccagccagccagacgcagacgcgcgagacagaacttaatgggcccgcataacagcgcgatttgctg  
gtgaccaatgcgaccagatgctccacgccagtcgcgtaccgtcttcattgggagaaaataatactgttg  
atgggtgtctggtcagagacatcaagaaataacgcgggaacattagtgcaggcagcttccacagcaattg  
catcctggctcatccagcggatagttaatgatcagcccactgacgcgttgcgcgagaagattgtgcaccgc  
cgctttacaggcttcgacgcgcgttcgttctaccatcgacaccaccacgctggcaccagttgatcggcg  
cgagatttaatcgccgcgacaatttgcgacggcgcggtgcagggccagactggaggtggcaacgccaatca  
gcaacgactgtttgccgcgcagttgttggtgccacgcgggtgggaatgtaattcagctccgccatcgccgc  
ttccactttttccgcgttttcgcagaaacgtggctggccctgggttcaccacgcgggaaacggtctgataa  
gagacaccggcataactctgcgacatcgataacggttactggtttcacattcaccaccctgaattgactct  
cttcggggcgctatcatgccataccgcgaaagggttttgcccatctcgatggtgtccgggatctcgacgct  
ctcccttatgcgactcctgcattaggaagcagcccagtagtaggttgaggccgttgagcaccgcgcgcgc  
aaggaaatggtgcatgcaaggagatggcgcccaacagtcoccccgccacggggcctgccaccatacccacg  
ccgaaacaagcgctcatgagcccgaagtggcgagcccgatcttccccatcggtgatgtcggcgatatag  
cgccagcaaccgcacctgtggcgccggtgatgccggccacgatgcgtccggcgtagaggatcgagatctc  
gatccgcgaaaattaatacgactcactataggggaattgtgagcggataacaattcccctctagaataa  
ttttgtttaactttaagaaggagatataccatgggcagcagccatcatcatcatcacagcagcggcc  
tggtgccgcgcggcagccatATGGTAGTCAAATTCAGTGACAGCCAAATCCAACATCTGATGGAGTATGG  
TGATAATGATTGGAGCGAGGCAGAATTTGAGGACGCTGCTGCTCGTGATAAAGAGTTTTCAAGCCAATTC  
TCCAAGTTGAAGAGTGCGAACGACAAAGGATTGAAAGACGTCATTGCGAACCCGCGTAATGACCTGACCG  
ACCTTGAAAATAAGATTTCGTGAGAACTTGCTGCACGCGGTTTCATCGAAGTGCATACGCCATTTTTTGT  
ATCTAAGAGTGCATTAGCCAAGATGACAATCACCGAGGATCATCCTTTATTCAAGCAGGCTTTC'TGGAT  
GACGACAAACGTGCCTTGCGTCCAATGCATGCGATGAATCTTGCTAAGGTACTGCGCGAGTTGCGCGAT  
ACACAAAGGGACCAGTCAAGATCTTCGAGATTGGCTCGTGCTTCCGCAAGGAAAGCAAGTCATCGACGCA  
TTTGGAAGAATTCACTATGCTGAACTTAGTTGAGATGGGACCCGATGGCGACCCTATGGAGCACCTTAAG  
ATGTATATTGGAGACATCATGGACGCGGTTGGTGTAGAATACACCACCTCACGTGAGGAGTCTGATGTGT  
ACGTAGAGACACTTGACGTGGAGATCAATGGAAGTGAAGTTGCGTCAGGAGCAGTAGGTCCTCATAAGCT  
TGACCC'TGCCACGATGTGCATGAACCCTGGGCAGGAATCGGATTCGGACTGGAGCGTCTGTTGATGCTT  
AAGAACGGTAAATCGAATGCTCGTAAGACAGGCAAAAGTATCACCTATTTGAATGGTTACAAATTGGAT  
AAgggatccgaattcgagctccgtcgacaagcttgcgggccgcactcgagcaccaccaccaccactgag  
atccggctgctaacaagcccgaaggaagctgagttggctgctgccaccgctgagcaataactagcata  
acccttggggcctctaaacgggtcttgaggggttttttgctgaaaggaggaactatatccggat
